# Supplementary material for: Duration of basic and attenuated-psychotic symptoms in individuals at clinical high risk for psychosis: pattern of symptom onset and effects of duration on functioning and cognition
Source: Springer Nature journal article supplement (doi:10.1186/s12888-021-03267-2), 2021-07-07
Supplement: MOESM1 [file 19340072]

Supplementary table 1: Summary of between group differences of onset of basic symptoms compared to onset of attenuated psychotic symptoms

|                        | <u>Paired t-test</u> |           |          |           |          |               | <u>Robust regression</u> |          |           |                |          |          |
|------------------------|----------------------|-----------|----------|-----------|----------|---------------|--------------------------|----------|-----------|----------------|----------|----------|
|                        | <b>N</b>             | <b>df</b> | <b>t</b> | <b>MD</b> | <b>p</b> | <b>95% CI</b> | <b>Cohen's d</b>         | <b>B</b> | <b>SE</b> | <b>t-value</b> | <b>F</b> | <b>p</b> |
| Male only              | 19                   | 18        | -0.01    | -0.004    | 1.00     | -0.69, 0.68   | 0.00                     | -0.055   | 0.188     | -0.293         | 0.09     | 0.770    |
| Female only            | 45                   | 44        | 0.04     | 0.007     | 1.00     | -0.36, 0.37   | -0.01                    | 0.094    | 0.093     | 1.021          | 1.02     | 0.319    |
| < 18 years             | 41                   | 40        | 0.1      | 0.02      | 0.80     | -0.4, 0.44    | 0.15                     | -0.015   | 0.136     | -0.113         | 0.01     | 0.911    |
| > 18 years             | 23                   | 22        | -0.1     | -0.026    | 0.90     | -0.53, 0.48   | -0.10                    | -0.016x  | 0.085     | -0.193         | 0.04     | 0.847    |
| No 3rd level education | 9                    | 7         | 0.4      | 0.18      | 0.70     | -0.78, 1.14   | -0.22                    | -0.037   | 0.195     | -0.191         | 0.04     | 0.855    |
| 3rd level education    | 55                   | 54        | -0.1     | -0.021    | 0.90     | -0.37, 0.33   | 0.02                     | 0.068    | 0.094     | 0.722          | 0.5      | 0.472    |
